# Supplementary material for: Patient as a Partner in Healthcare-Associated Infection Prevention
Source: MDPI journal article supplement (doi:10.3390/ijerph15040624), 2018-03-29
Supplement: s1 [file s1]

## Supplementary Material

**Annex 1.** Questions used in the questionnaire survey and in structured interviews (hand hygiene, HH, healthcare workers, HCWs).

|                                                                                                                                                                                              |
|----------------------------------------------------------------------------------------------------------------------------------------------------------------------------------------------|
| <b>Questionnaire Survey—Questions About the Knowledge of Hand Hygiene</b>                                                                                                                    |
| 1.1. Questions that only HCWs were asked:                                                                                                                                                    |
| When should the '5 Moments for HH' be performed?(open question)                                                                                                                              |
| How often other HCWs performed HH before drawing your blood for testing (in outside analytical laboratories)?<br>(Likert scale: always/ often/ rarely)                                       |
| Would you admonish an HCW that they do not comply with HH? (answer choice: yes/no)                                                                                                           |
| 1.2. Question that only patients were asked:                                                                                                                                                 |
| Being at the hospital, did you know that the medical staff conducted HH during medical procedures? (answer choice: yes/no)                                                                   |
| How often did HCWs perform HH before touching you? (Likert scale: always/ often/ rarely)                                                                                                     |
| How often did HCWs perform HH before examining you? (Likert scale: always/ often/ rarely)                                                                                                    |
| How often did HCWs perform HH prior to oral drug administration? (Likert scale: always/ often/ rarely)                                                                                       |
| How often did HCWs perform HH before drawing blood / piercing a vein? (Likert scale: always/ often/ rarely)                                                                                  |
| 1.3. Questions that both HCWs and patients were asked:                                                                                                                                       |
| When you were attending primary and secondary schools, was there a supply of soap and towels in the bathrooms?<br>(answer choice: yes/no)                                                    |
| Give the level of the felt need for hand hygiene after their contamination in particular situations associated with health and disease (Likert scale: 1 – clean hands, 7 – very dirty hands) |
| <b>Structured Interviews—Questions (only HCWs)</b>                                                                                                                                           |
| On a scale of 1 to 5, how do you assess the level of HH among HCWs?<br>(Likert scale: 1 – Very Low; 5 – Very High)                                                                           |
| What did you feel when a patient admonished you for not complying with HH?                                                                                                                   |
| Have you ever drawn the attention of an HCW because of a lack of conducting HH? (answer choice: yes/no)<br>and in what circumstances?                                                        |
